# Supplementary material
Source: PubMed Central journal article supplement (PMC11330663)
Supplement: NIHMS1995521-supplement-Supplemental_material.pdf [file NIHMS1995521-supplement-Supplemental_material.pdf]

## **PARTICIPANT SAMPLE**

Survey data was collected from 2 sites: (1) Amazon's Mechanical Turk (Mturk) workers aged 18 years or older and living in the U.S., and (2) 4 correctional facilities. These data are part a larger research project on violence exposure by CDC and inclusion of incarcerated participants was necessary to ensure sufficient variance of low base rate behaviors such as violence.

Participants drawn from Mturk (N=1,286) were 56.9% female, 1.7% gender minority, and 41.4% male. Approximately 9.4% self-identified as Hispanic, 84.1% identified as White, with 10.1% identifying as Black or African American, 7.4% as Asian or Pacific Islander, 2.3% as American Indian/Alaska Native, 0.5% as Native Hawaiian or Pacific Islander, and 12% identifying as 2 or more races. Ages ranged from 18 to 76 with a mean of 34 (10.8) and median of 31.

Of the incarcerated participants ( $n=165$ ), 19.4% did not indicate their gender identity, 40.6% were female, 0.6% were gender minority. Among those incarcerated, 5.7% endorsed being Hispanic, 75% self-identified as White, 26.9% identified as Black or African American, 0% as Asian, 1.9% as American Indian/Alaska Native, 0% as Native Hawaiian or Pacific Islander, and 6.5% identified as 2 or more races. Ages ranged from 18 to 61 years with a mean of 36.4 (9.3) and median of 35.

## **PROCEDURE**

Data collection from Mturk began by posting an open (i.e., all Mturk workers were eligible to complete) demographic survey to identify individuals to recruit for the full survey. The demographic screener survey was completed by 7,689 MTurk workers. From this screener data,

**Appendix**  
**Measurement of Adverse Childhood Experiences: It Matters**  
**Reidy et al.**

2,600 were invited to complete the full survey. Recruitment was stratified by biological sex and sexual identity. Within the sex and sexual identity subgroups, the sample was matched as closely as possible to the U.S. population demographics for age, race, ethnicity, education, and income. A total of 1,742 MTurk workers accepted the invitation to complete the full survey. Of these individuals, 456 were removed because they (1) completed less than 80% of the survey, (2) had 3 or more discrepancies on demographic data reported in the screening survey and full survey), or (3) failed attention and validity checks.

Data from male inmates were collected at 2 medium security prisons and 1 work release/re-entry facility. Data from female inmates were collected from 1 minimum security prison. Inmates eligible to participate in the study were scheduled to meet with the research team to receive information about the study and provide informed consent. Data were collected using 2 survey administration methods, including (1) self-administered, using a laptop to read and answer questions electronically and (2) interviewer-administered, where questions were read out loud and recorded electronically by the interviewer.

All materials and procedures were approved for this study by the CDC's IRB and by the Office of Management and Budgets (OMB).

**Appendix**  
**Measurement of Adverse Childhood Experiences: It Matters**  
**Reidy et al.**

**Appendix Table 1.** Adverse Childhood Experiences (ACEs) Scale

| <b>Questions</b>                                                                                                                                                  | <b>Response options</b>                                         | <b>ACE domain</b>           |
|-------------------------------------------------------------------------------------------------------------------------------------------------------------------|-----------------------------------------------------------------|-----------------------------|
| 1. How often did a parent or other adult in the household swear at you, insult you, put you down, or humiliate you?                                               | Never (0); Rarely (1); Sometimes (2); Often (3); Very Often (4) | Emotional Abuse             |
| 2. How often did a parent or other adult in the household act in a way that made you afraid that you might be physically hurt?                                    | Never (0); Rarely (1); Sometimes (2); Often (3); Very Often (4) | Emotional Abuse             |
| 3. How often did a parent or other adult in the household push, slap, or throw something at you?                                                                  | Never (0); Rarely (1); Sometimes (2); Often (3); Very Often (4) | Physical Abuse              |
| 4. How often did a parent or other adult in the household ever hit you so hard that you had marks (bruises or cuts) or were injured?                              | Never (0); Rarely (1); Sometimes (2); Often (3); Very Often (4) | Physical Abuse              |
| 5. As a child, how often did anyone ever force you to have sex or to do something sexual that you did not want to do?                                             | Never (0); Rarely (1); Sometimes (2); Often (3); Very Often (4) | Sexual Abuse                |
| 6. As a child, how often did you hear or see one of your parents or guardians being physically hurt (e.g., hit, slapped, punched, kicked, etc.) by their partner? | Never (0); Rarely (1); Sometimes (2); Often (3); Very Often (4) | Witnessing Violence in Home |
| 7. How often did you feel that no one in your family loved you or thought you were important or special?                                                          | Never (0); Rarely (1); Sometimes (2); Often (3); Very Often (4) | Emotional Neglect           |
| 8. How often did you feel that you didn't have enough to eat, had to wear dirty clothes, and had no one to protect you?                                           | Never (0); Rarely (1); Sometimes (2); Often (3); Very Often (4) | Physical Neglect            |
| 9. How often did you feel that your parents or guardians were too drunk or high to take care of you or take you to the doctor if you needed it?                   | Never (0); Rarely (1); Sometimes (2); Often (3); Very Often (4) | Physical Neglect            |
| 10. How often did you see anyone shot or stabbed?                                                                                                                 | Never (0); Rarely (1); Sometimes (2); Often (3); Very Often (4) | Community Violence          |
| 11. How often did you see anyone beaten up or hurt really badly by someone else?                                                                                  | Never (0); Rarely (1); Sometimes (2); Often (3); Very Often (4) | Community Violence          |
| 12. How often were you afraid to go outside because of gangs or drugs in your neighborhood?                                                                       | Never (0); Rarely (1); Sometimes (2); Often (3); Very Often (4) | Community Violence          |
| 13. How often did you have to hide someplace because of gun violence in your neighborhood?                                                                        | Never (0); Rarely (1); Sometimes (2); Often (3); Very Often (4) | Community Violence          |
| 14. Did you live with anyone who was a problem drinker or alcoholic or who regularly used drugs to get high?                                                      | No (0); Yes (1);                                                | Household Dysfunction       |

**Appendix**  
**Measurement of Adverse Childhood Experiences: It Matters**  
**Reidy et al.**

|                                                                 |                  |                       |
|-----------------------------------------------------------------|------------------|-----------------------|
| 15. Did you live with anyone who was depressed or mentally ill? | No (0); Yes (1); | Household Dysfunction |
| 16. Did you live with anyone who attempted suicide?             | No (0); Yes (1); | Household Dysfunction |
| 17. Did you live with anyone who ever went to prison?           | No (0); Yes (1); | Household Dysfunction |

*Note: All ACE questions included the following preface, While you were growing up, during your first 18 years of life....*

**Appendix**  
**Measurement of Adverse Childhood Experiences: It Matters**  
**Reidy et al.**

**Appendix Table 2.** Model Estimates of Explained Variance for White Participants

| Outcome variables      | All Caucasians<br>(N=1,054)   |                               |                               | Males<br>(N=418)              |                               |                               | Females<br>(N=605)            |                               |                               |
|------------------------|-------------------------------|-------------------------------|-------------------------------|-------------------------------|-------------------------------|-------------------------------|-------------------------------|-------------------------------|-------------------------------|
|                        | R <sup>2</sup> <sub>adj</sub> |
|                        | Model 1                       | Model 2                       | Model 3                       | Model 1                       | Model 2                       | Model 3                       | Model 1                       | Model 2                       | Model 3                       |
| Education              | 0.05                          | 0.08                          | 0.08                          | 0.05                          | 0.08                          | 0.08                          | 0.04                          | 0.06                          | 0.07                          |
| Job length             | 0.02                          | 0.04                          | 0.04                          | 0.02                          | 0.06                          | 0.06                          | 0.01                          | 0.01                          | 0.01                          |
| PTSD                   | 0.14                          | 0.17                          | 0.19                          | 0.17                          | 0.21                          | 0.24                          | 0.12                          | 0.13                          | 0.15                          |
| Anxiety                | 0.09                          | 0.13                          | 0.13                          | 0.09                          | 0.14                          | 0.13                          | 0.08                          | 0.11                          | 0.11                          |
| Depression             | 0.11                          | 0.16                          | 0.17                          | 0.10                          | 0.13                          | 0.15                          | 0.10                          | 0.17                          | 0.17                          |
| ODD/CD                 | 0.05                          | 0.10                          | 0.11                          | 0.11                          | 0.18                          | 0.16                          | 0.02                          | 0.02                          | 0.07                          |
| Borderline             | 0.06                          | 0.09                          | 0.09                          | 0.08                          | 0.11                          | 0.14                          | 0.05                          | 0.06                          | 0.08                          |
| Intoxication           | 0.01                          | 0.04                          | 0.03                          | 0.01                          | 0.04                          | 0.04                          | 0.02                          | 0.04                          | 0.04                          |
| Cannabis               | 0.05                          | 0.08                          | 0.06                          | 0.01                          | 0.05                          | 0.03                          | 0.07                          | 0.09                          | 0.08                          |
| Cocaine                | 0.05                          | 0.08                          | 0.10                          | 0.04                          | 0.10                          | 0.15                          | 0.05                          | 0.12                          | 0.15                          |
| Illicit opioids        | 0.05                          | 0.07                          | 0.08                          | 0.05                          | 0.07                          | 0.15                          | 0.04                          | 0.06                          | 0.06                          |
| Pain medicine          | 0.05                          | 0.07                          | 0.07                          | 0.07                          | 0.10                          | 0.11                          | 0.04                          | 0.05                          | 0.04                          |
| Amphetamines           | 0.04                          | 0.07                          | 0.08                          | 0.05                          | 0.09                          | 0.12                          | 0.03                          | 0.07                          | 0.07                          |
| Arrests                | 0.06                          | 0.12                          | 0.14                          | 0.07                          | 0.09                          | 0.16                          | 0.04                          | 0.13                          | 0.13                          |
| IPV arrests            | 0.06                          | 0.10                          | 0.18                          | 0.10                          | 0.12                          | 0.28                          | 0.05                          | 0.09                          | 0.13                          |
| SV arrests             | 0.03                          | 0.07                          | 0.17                          | 0.06                          | 0.10                          | 0.24                          | 0.02                          | 0.05                          | 0.12                          |
| Rape                   | 0.05                          | 0.15                          | 0.22                          | 0.11                          | 0.26                          | 0.35                          | 0.02                          | 0.09                          | 0.13                          |
| Assault injury         | 0.08                          | 0.13                          | 0.16                          | 0.12                          | 0.17                          | 0.21                          | 0.06                          | 0.12                          | 0.16                          |
| Assault with<br>weapon | 0.08                          | 0.17                          | 0.20                          | 0.14                          | 0.21                          | 0.23                          | 0.04                          | 0.12                          | 0.18                          |

*Note:* Model 1 = ACE count score as sole predictor of outcomes; Model 2 = Multiple regression with binary ACE predictors; Model 3 = Multiple regression with ordinal ACE predictors; Education = highest level of school completed; Job Length = longest job held; PTSD = Post traumatic stress disorder; ODD/CD = Oppositional defiant disorder/Conduct disorder; Borderline = Borderline personality disorder; Intoxication = number of days in a typical month drank until intoxicated; Cannabis = number of days in a typical month used cannabis products; Cocaine = number of days in a typical month used cocaine; Illicit Opioids = number of days in a typical month used illicit opioids; Pain Medicine = number of days in a typical month used pain medicine; Amphetamines = number of days in a typical month used amphetamines; Arrests = number of times ever arrested; IPV Arrests = number of times ever arrested for violence against a dating partner or spouse; SV Arrests = number of times ever arrested for sexual assault; Rape = number of times forced or tried to force someone to have sex against their will; Assault Injury = number of times ever attacked someone causing injury; Assault with Weapon = number of times ever attacked someone with a weapon.

**Appendix**  
**Measurement of Adverse Childhood Experiences: It Matters**  
**Reidy et al.**

**Appendix Table 3.** Model Estimates of Explained Variance for Mturk vs Prison Participants

| Outcome variables   | Mturk sample<br>(N=1,286) |             |             | Prison sample<br>(N=165) |             |             |
|---------------------|---------------------------|-------------|-------------|--------------------------|-------------|-------------|
|                     | $R^2_{adj}$               | $R^2_{adj}$ | $R^2_{adj}$ | $R^2_{adj}$              | $R^2_{adj}$ | $R^2_{adj}$ |
|                     | Model 1                   | Model 2     | Model 3     | Model 1                  | Model 2     | Model 3     |
| Education           | 0.02                      | 0.04        | 0.04        | 0.00                     | 0.04        | 0.11        |
| Job length          | 0.01                      | 0.03        | 0.03        | 0.01                     | 0.10        | 0.14        |
| PTSD                | 0.13                      | 0.15        | 0.17        | 0.14                     | 0.21        | 0.22        |
| Anxiety             | 0.08                      | 0.11        | 0.12        | 0.10                     | 0.24        | 0.24        |
| Depression          | 0.10                      | 0.16        | 0.16        | 0.15                     | 0.23        | 0.25        |
| ODD/CD              | 0.06                      | 0.10        | 0.15        | 0.06                     | 0.06        | 0.10        |
| Borderline          | 0.07                      | 0.09        | 0.12        | 0.11                     | 0.12        | 0.19        |
| Intoxication        | 0.01                      | 0.03        | 0.03        | 0.00                     | 0.00        | 0.00        |
| Cannabis            | 0.04                      | 0.07        | 0.07        | 0.00                     | 0.00        | 0.00        |
| Cocaine             | 0.04                      | 0.09        | 0.15        | 0.02                     | 0.00        | 0.01        |
| Illicit opioids     | 0.03                      | 0.06        | 0.10        | 0.02                     | 0.06        | 0.09        |
| Pain medicine       | 0.04                      | 0.06        | 0.05        | 0.00                     | 0.08        | 0.08        |
| Amphetamines        | 0.03                      | 0.05        | 0.09        | 0.00                     | 0.00        | 0.04        |
| Arrests             | 0.04                      | 0.09        | 0.11        | 0.00                     | 0.00        | 0.00        |
| IPV arrests         | 0.06                      | 0.10        | 0.19        | 0.03                     | 0.03        | 0.08        |
| SV arrests          | 0.05                      | 0.10        | 0.25        | 0.00                     | 0.00        | 0.00        |
| Rape                | 0.06                      | 0.15        | 0.24        | 0.00                     | 0.00        | 0.19        |
| Assault injury      | 0.07                      | 0.13        | 0.17        | 0.04                     | 0.14        | 0.23        |
| Assault with weapon | 0.09                      | 0.14        | 0.25        | 0.01                     | 0.21        | 0.33        |

*Note:* Model 1 = ACE count score as sole predictor of outcomes; Model 2 = Multiple regression with binary ACE predictors; Model 3 = Multiple regression with ordinal ACE predictors; Education = highest level of school completed; Job Length = longest job held; PTSD = Post traumatic stress disorder; ODD/CD = Oppositional defiant disorder/Conduct disorder; Borderline = Borderline personality disorder; Intoxication = number of days in a typical month drunk until intoxicated; Cannabis = number of days in a typical month used cannabis products; Cocaine = number of days in a typical month used cocaine; Illicit Opioids = number of days in a typical month used illicit opioids; Pain Medicine = number of days in a typical month used pain medicine; Amphetamines = number of days in a typical month used amphetamines; Arrests = number of times ever arrested; IPV Arrests = number of times ever arrested for violence against a dating partner or spouse; SV Arrests = number of times ever arrested for sexual assault; Rape = number of times forced or tried to force someone to have sex against their will; Assault Injury = number of times ever attacked someone causing injury; Assault with Weapon = number of times ever attacked someone with a weapon.
